# Supplementary material
Source: PubMed Central journal article supplement (PMC3219159)
Supplement: isl0305_0250SD1.pdf [file isl0305_0250SD1.pdf]

**Additional data file 1.**

| Days | Secreted insulin by hislets<br>(mean $\pm$ SD; ng/mg protein content) |                |                |               |
|------|-----------------------------------------------------------------------|----------------|----------------|---------------|
|      | CTRL (n=4)                                                            |                | hPL (n=4)      |               |
|      | 0 mM glucose                                                          | 25mM glucose   | 0 mM glucose   | 25mM glucose  |
| 2    | 0.50 $\pm$ 0.2                                                        | 1.00 $\pm$ 0.1 | 0.42 $\pm$ 0.2 | 7.6 $\pm$ 4.0 |
| 4    | 0.51 $\pm$ 0.3                                                        | 0.91 $\pm$ 0.2 | 0.72 $\pm$ 0.5 | 4.8 $\pm$ 3.2 |
| 8    | 0.33 $\pm$ 0.1                                                        | 1.04 $\pm$ 1.2 | 0.55 $\pm$ 0.1 | 1.2 $\pm$ 0.8 |
| 14   | 0.88 $\pm$ 0.3                                                        | 5.10 $\pm$ 0.8 | 0.47 $\pm$ 0.8 | 4.7 $\pm$ 0.4 |

**Secreted insulin before and after glucose challenge.** After 2, 4, 8, and 14 days of treatment both CTRL and hPL-treated human cultured islets were challenged with 25 mM glucose. Insulin secretion was assayed before and after glucose stimulation by RIA. Secreted insulin values were normalized by protein concentration.
